# Supplementary material
Source: PubMed Central journal article supplement (PMC2703290)
Supplement: NIHMS97121-supplement-1_si_001.pdf [file NIHMS97121-supplement-1_si_001.pdf]

## Supporting Information

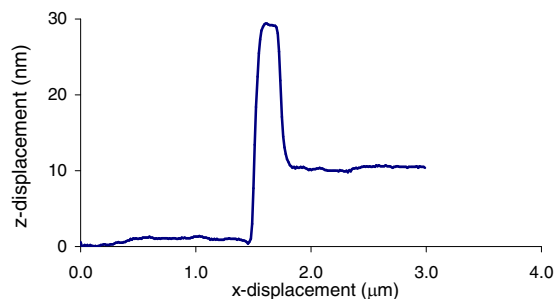

**Supporting Information Figure 1.** Representative AFM height measurement on crosslinked aECM-RGD. The film was scratched to reveal the underlying glass substrate. The dry height of the film was 8–10 nm. The edge of the film is deformed by the scratch.

| Substrates          | Number | C/N Ratio |      |           |                      | PEGylation         |                         |
|---------------------|--------|-----------|------|-----------|----------------------|--------------------|-------------------------|
|                     |        | Theor.    | Avg. | Std. Dev. | Ratio Above Baseline | fraction of amines | # of amines per protein |
| aECM-RGD            | 3      | 3.75      | 4.67 | 0.05      |                      |                    |                         |
| aECM-RGD-PEG        | 7      | 10.57     | 5.65 | 0.56      | 0.98                 | 0.11               | 1.8                     |
| aECM-RGD + PEG 4600 | 4      | 3.75      | 4.76 | 0.11      | 0.08                 | 0.01               | 0.2                     |

**Supporting Information Table 1.** XPS data for crosslinked aECM-RGD, aECM-RGD-PEG, and aECM-RGD + PEG 4600 with no reactive ends. The numbers of substrates and the theoretical and measured carbon to nitrogen (C/N) ratios are shown. The theoretical C/N ratio for the aECM-RGD-PEG films was determined by assuming that 4.25 amines per protein are consumed in the BS<sup>3</sup> crosslinking reaction and that all remaining amines are PEGylated. To account for the fact that the C/N ratio for aECM-RGD is higher than the theoretical value, the measured C/N ratio of aECM-RGD was taken as the baseline value and subtracted from the measured values of all PEGylated samples.
